# Supplementary material for: A low-cost and effective bagasse-based magnetic porous biochar as an adsorbent for solid phase extraction of triazine herbicides in brown sugar
Source: Royal Society of Chemistry journal article supplement (doi:10.1039/d1ay00867f), 2021-01-01
Supplement: d1ay00867f1.pdf [file d1ay00867f1.pdf]

## A low-cost and effective bagasse-based magnetic porous biochar as adsorbent for solid phase extraction of triazine herbicides in brown sugar

Peng Li <sup>a,b</sup>, Jiyong Fang <sup>c</sup>, Dongting Huang <sup>a,b</sup>, Jingjie Tang <sup>a,b</sup>, Junsheng Huang <sup>a,b</sup>, Fei Meng <sup>\*a,b</sup>

<sup>a</sup> Institute of Bioengineering, Guangdong Academy of Sciences, Guangzhou 510316, People's Republic of China.

<sup>b</sup> Guangdong Engineering Research Center for Sugar Technology, Guangzhou 510316, People's Republic of China.

<sup>c</sup> School of Materials and Energy, Guangdong University of Technology, Guangzhou 510006, People's Republic of China.

\*Corresponding author: Fei Meng

E-mail: gbimengfei@126.com

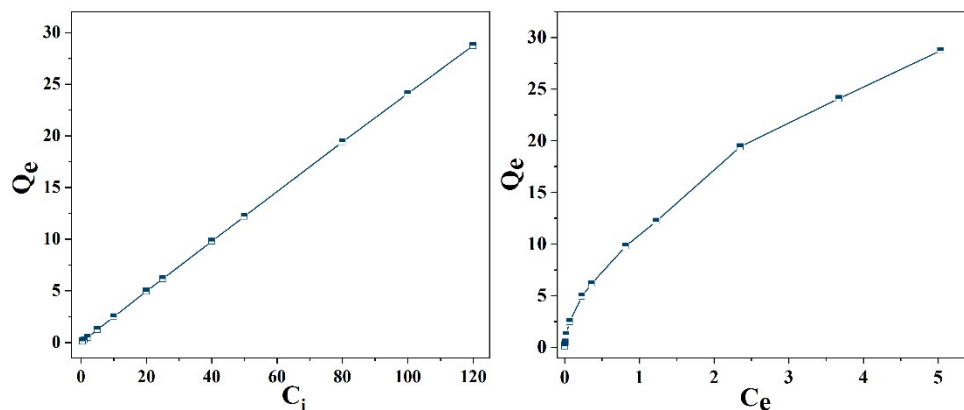

Fig. S1 Adsorption isotherms of MPB for atrazine adsorption

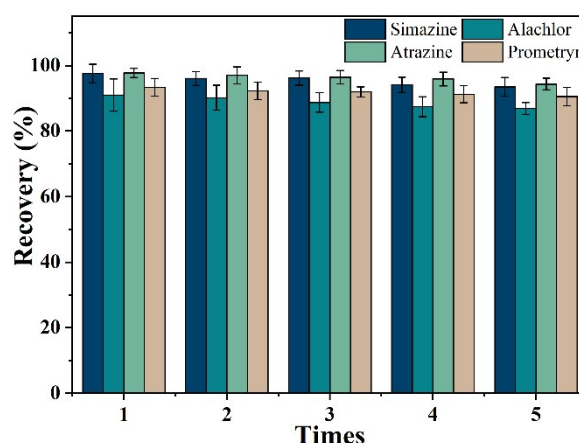

Fig. S2 The recoveries of four triazines after five recycling five times

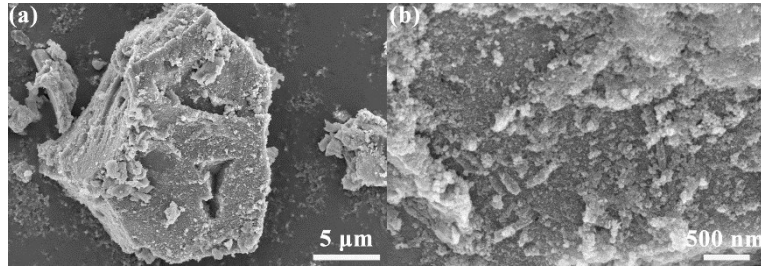

Fig. S3 The SEM of MPB after five recycling five times

Table S1 The equations and parameters of Langmuir and Freundlich isotherm model

| Isotherm models | Equations                               | Parameters |        |
|-----------------|-----------------------------------------|------------|--------|
| Langmuir        | $C_e/Q = C_e/Q_{max} + 1/(K_L Q_{max})$ | $R^2$      | 0.9050 |
|                 |                                         | $Q_{max}$  | 30.86  |
|                 |                                         | $K_L$      | 1.01   |
| Freundlich      | $Q_e = K_F C_e^{1/n_F}$                 | $R^2$      | 0.9873 |
|                 |                                         | $K_F$      | 1.94   |
|                 |                                         | $n_F$      | 0.41   |

$Q_{max}$ : The maximum adsorption capacity

$K_L$ : Langmuir constant

$K_F$ : Freundlich constant

$n_F$ : Adsorption intensity
